# Supplementary material for: Fusing acridine and benzofuran/benzothiophene as a novel hybrid donor for high-performance and low efficiency roll-off TADF OLEDs
Source: Royal Society of Chemistry journal article supplement (doi:10.1039/c9tc05533a), 2019-12-20
Supplement: c9tc05533a1.pdf [file c9tc05533a1.pdf]

# **Fusing the acridine and benzofuran/benzothiophene as novel hybrid donor for high-performance and low efficiency roll-off TADF OLEDs**

Qing Zhang<sup>a</sup>, Yaxiong Wang<sup>a</sup>, Sung Joon Yoon<sup>b</sup>, Won Jae Chung<sup>b</sup>, Shaofeng Ye<sup>a</sup>, Runda Guo<sup>a</sup>, Panpan Leng<sup>a</sup>, Shuaiqiang Sun<sup>a</sup>, Jun Yeob Lee<sup>\*b</sup>, Lei Wang<sup>\*a</sup>

<sup>a</sup> Wuhan National Laboratory for Optoelectronics, Huazhong University of Science and Technology, Wuhan, 430074, P. R. China

Email: [wanglei@mail.hust.edu.cn](mailto:wanglei@mail.hust.edu.cn)

<sup>b</sup> School of Chemical Engineering, Sungkyunkwan University, Suwon, Gyeonggi, 440-746, Republic of Korea.

E-mail: [leej17@skku.edu](mailto:leej17@skku.edu)

The equations for the calculation of exciton dynamic rate constants: **Page 3**;

**Table S1** The detail kinetic parameters: **Page 3**;

**Scheme 1** The synthetic route of the fused hybrid donors: **Page 3**;

<sup>1</sup>H NMR data of the essential intermediates: **Page 4**;

**Fig. S1** <sup>1</sup>H NMR spectrum of 34BFAC: **Page 5**;

**Fig. S2** <sup>1</sup>H NMR spectrum of 34BFAC: **Page 6**;

**Scheme S2** The molecular structure and function of the material in device fabrication:  
**Page 6**;

**Fig. S3** The external quantum efficiency (EQE) as a function of current density and the fitting results according to TTA and SPA: **Page 7**;

Transient PL characteristics, fabrication and performance measurement for DPEPO-hosted devices were the same as the reports.<sup>1-3</sup> Apart from the above experiment, the computational details and measurement instruments so on were cited by our previous work.<sup>4-6</sup>

The evaluation of exciton dynamic rate constants was calculated by equation S1-S7:

$$k_{PF} = \frac{\phi_{PF}}{\tau_P} \quad \text{Equation S1}$$

$$k_{DF} = \frac{\phi_{DF}}{\tau_D} \quad \text{Equation S2}$$

$$k_{ISC} = \frac{\phi_{DF}}{\phi_{PF} + \phi_{DF}} k_{PF} \quad \text{Equation S3}$$

$$k_{RISC} = \frac{k_{DF} k_{PF} \phi_{DF}}{k_{ISC} \phi_{PF}} \quad \text{Equation S4}$$

$$k_{PF} = k_r^S + k_{nr}^S + k_{ISC} \quad \text{Equation S5}$$

$$\phi_{PF} = \frac{k_r^S}{k_r^S + k_{nr}^S + k_{ISC}} = \frac{k_r^S}{k_{PF}} \quad \text{Equation S6}$$

$$\phi_{ISC} = \frac{k_{ISC}}{k_r^S + k_{nr}^S + k_{ISC}} = \frac{k_{ISC}}{k_{PF}} \quad \text{Equation S7}$$

**Table S1** The detail kinetic parameters

| Emitters         | $\phi_{\text{PL}}^a$<br>(%) | $\phi_{\text{P}}/\phi_{\text{D}}^b$<br>(%) | $\tau_{\text{p}}/\tau_{\text{d}}^c$<br>(ns)/( $\mu\text{s}$ ) | $k_{\text{PF}}^d$<br>( $10^7 \text{ s}^{-1}$ ) | $k_{\text{DF}}^d$<br>( $10^5 \text{ s}^{-1}$ ) | $k_{\text{ISC}}^d$<br>( $10^7 \text{ s}^{-1}$ ) | $k_{\text{RISC}}^d$<br>( $10^5 \text{ s}^{-1}$ ) | $k_{\text{r}}^{\text{S},d}$<br>( $10^7 \text{ s}^{-1}$ ) | $k_{\text{nr}}^{\text{S},d}$<br>( $10^6 \text{ s}^{-1}$ ) | $\Phi_{\text{ISC}}^d$<br>(%) |
|------------------|-----------------------------|--------------------------------------------|---------------------------------------------------------------|------------------------------------------------|------------------------------------------------|-------------------------------------------------|--------------------------------------------------|----------------------------------------------------------|-----------------------------------------------------------|------------------------------|
| <b>12BFAc-PM</b> | 65                          | 53/16                                      | 11/6.4                                                        | 4.8                                            | 0.3                                            | 1.1                                             | 0.3                                              | 2.5                                                      | 11.3                                                      | 24                           |
| <b>12BTAc-PM</b> | 87                          | 29/58                                      | 8/3.8                                                         | 3.6                                            | 1.5                                            | 2.4                                             | 4.7                                              | 1.0                                                      | 1.5                                                       | 67                           |
| <b>34BFAc-PM</b> | 95                          | 55/40                                      | 21/3.5                                                        | 2.6                                            | 1.1                                            | 1.1                                             | 1.9                                              | 1.5                                                      | 0.8                                                       | 42                           |
| <b>34BTAc-PM</b> | 92                          | 56/36                                      | 25/3.4                                                        | 2.3                                            | 1.0                                            | 0.9                                             | 1.7                                              | 1.3                                                      | 1.1                                                       | 39                           |

<sup>a</sup> Absolute PL quantum yield measured with integrating spheres, <sup>b</sup> According to the prompt and delayed components in transient delay curves.; <sup>c</sup> Fitted transient PL curve of prompt and decay components; <sup>d</sup> Calculated using equations S1-S7; <sup>e</sup> Data from Figure 3b;

We selected the following routes. As shown in Scheme S1, the alcohol type intermediate **1** were prepared according to the reports.<sup>2, 7</sup> Differently, the intermediate **2** were synthesized referencing from the other reports.<sup>8</sup> Subsequently, according to our previous reports, alcohol type intermediates were synthesized using Grignard reaction and further were readily converted into novel Ac-benzofuran/benzothiophene hybrid donors (**12BFAc**, **12BTAc**, **34BFAc** and **34BTAc**) with the refluxed reaction of hydrochloric acid and glacial acetic acid.<sup>9</sup>

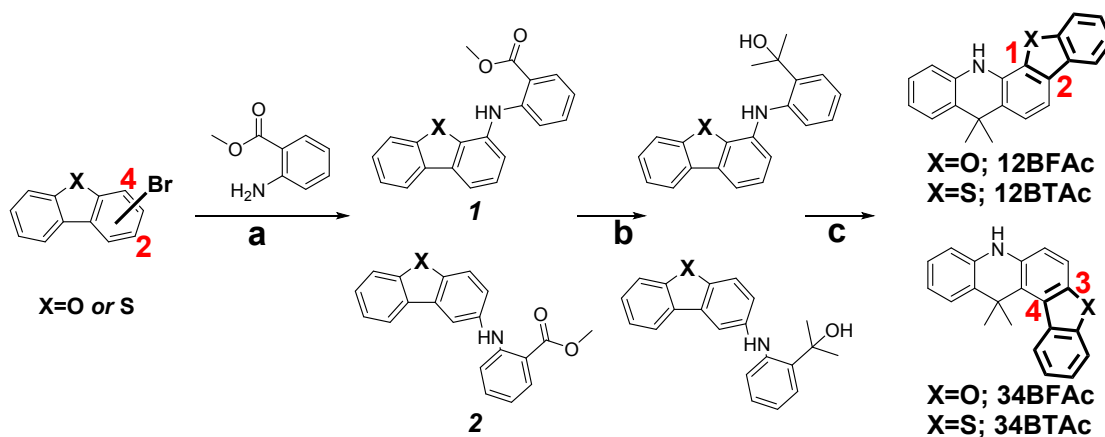

**Scheme 1** (a) **1**: Pd(OAc)<sub>2</sub>, Xantphos, Cs<sub>2</sub>CO<sub>3</sub>, N<sub>2</sub>, refluxed 24 h; **2**: Pd(OAc)<sub>2</sub>, P(t-Bu)<sub>3</sub>, Cs<sub>2</sub>CO<sub>3</sub>, Toluene, N<sub>2</sub>, refluxed, 24 h; (b) CH<sub>3</sub>ClMg, dry tetrahydrofuran (THF), N<sub>2</sub>, room temperature, overnight; (c) AcOH, HCl, refluxed 12 h;

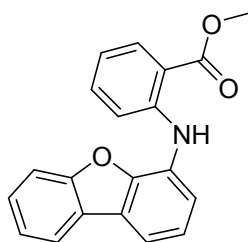

$^1\text{H}$  NMR (600 MHz, DMSO- $d_6$ )  $\delta$  = 9.74 (s, 1H), 8.24 – 8.09 (m, 1H), 7.97 (dd,  $J$ =8.1, 1.7, 1H), 7.90 (d,  $J$ =7.6, 1H), 7.74 (d,  $J$ =8.2, 1H), 7.54 (td,  $J$ =8.1, 2.4, 2H), 7.47 – 7.37 (m, 3H), 7.17 (d,  $J$ =8.5, 1H), 6.92 – 6.82 (m, 1H), 3.91 (s, 3H).

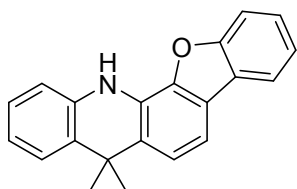

**12BFac**

$^1\text{H}$  NMR (600 MHz, DMSO- $d_6$ )  $\delta$  = 9.28 (s, 1H), 8.11 – 8.02 (m, 1H), 7.72 (d,  $J$ =8.2, 1H), 7.56 – 7.47 (m, 2H), 7.40 (dd,  $J$ =8.0, 2.9, 3H), 7.20 (dd,  $J$ =8.0, 1.3, 1H), 7.10 (dd,  $J$ =8.2, 6.9, 1H), 6.87 (t,  $J$ =7.4, 1H), 1.59 (s, 6H).

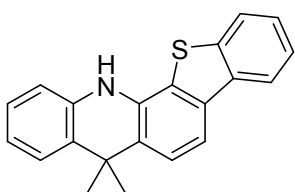

**12BTac**

$^1\text{H}$  NMR (600 MHz, DMSO- $d_6$ )  $\delta$  = 8.71 (s, 1H), 8.30 – 8.24 (m, 1H), 8.10 – 8.04 (m, 1H), 7.85 – 7.79 (m, 1H), 7.56 (d,  $J$ =8.2, 1H), 7.51 (td,  $J$ =6.4, 5.6, 3.5, 2H), 7.43 (d,  $J$ =7.8, 1H), 7.23 (dd,  $J$ =8.0, 1.3, 1H), 7.15 – 7.09 (m, 1H), 6.89 (t,  $J$ =7.4, 1H), 1.61 (s, 6H).

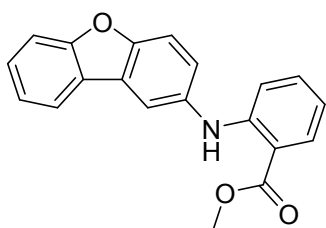

$^1\text{H}$  NMR (600 MHz, DMSO- $d_6$ )  $\delta$  = 9.42 (s, 1H), 8.37 – 7.98 (m, 2H), 8.02 – 7.84 (m, 1H), 7.70 (t,  $J$ =8.7, 2H), 7.63 – 7.28 (m, 4H), 7.10 (d,  $J$ =8.9, 1H), 6.77 (t,  $J$ =7.7, 1H), 3.87 (s, 3H).

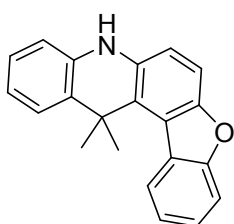

**34BFac**

$^1\text{H}$  NMR (600 MHz, DMSO- $d_6$ )  $\delta$  8.81 (s, 1H), 8.16 (dd,  $J$  = 8.1, 1.2 Hz, 1H), 7.69 (dd,  $J$  = 8.2, 1.1 Hz, 1H), 7.52 (t,  $J$  = 1.1 Hz, 1H), 7.46 (dd,  $J$  = 8.4, 6.7 Hz, 2H), 7.38 (dd,  $J$  = 7.8, 1.4 Hz, 1H), 7.02 (t,  $J$  = 1.1 Hz, 1H), 6.97 (d,  $J$  = 8.7 Hz, 1H), 6.77 (d,  $J$  = 1.3 Hz, 1H), 6.68 (dd,  $J$  = 8.0, 1.3 Hz, 1H), 1.95 (s, 6H).

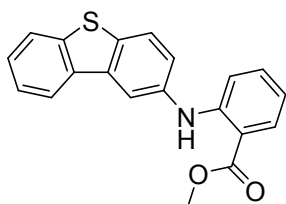

$^1\text{H}$  NMR (600 MHz, DMSO- $d_6$ )  $\delta$  = 9.46 (s, 1H), 8.37 – 8.26 (m, 1H), 8.22 (d,  $J$ =2.1, 1H), 7.97 (t,  $J$ =8.1, 2H), 7.89 (dd,  $J$ =8.0, 1.7, 1H), 7.53 – 7.33 (m, 4H), 7.24 – 7.17 (m, 1H), 6.85 – 6.72 (m, 1H), 3.85 (s, 3H).

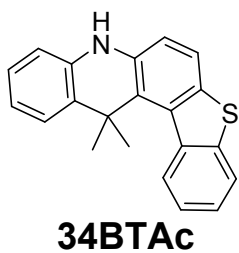

$^1\text{H}$  NMR (600 MHz,  $\text{DMSO-}d_6$ )  $\delta$  8.89 (s, 1H), 8.43 (d,  $J = 8.5$  Hz, 1H), 8.03 (dd,  $J = 7.9, 1.3$  Hz, 1H), 7.74 (d,  $J = 8.5$  Hz, 1H), 7.55 (ddd,  $J = 8.5, 6.6, 1.4$  Hz, 1H), 7.49 (t,  $J = 7.4$  Hz, 1H), 7.37 (d,  $J = 7.7$  Hz, 1H), 7.02 (dt,  $J = 7.9, 3.3$  Hz, 2H), 6.81 – 6.74 (m, 1H), 6.69 (dd,  $J = 7.9, 1.2$  Hz, 1H), 2.04 (s, 6H).

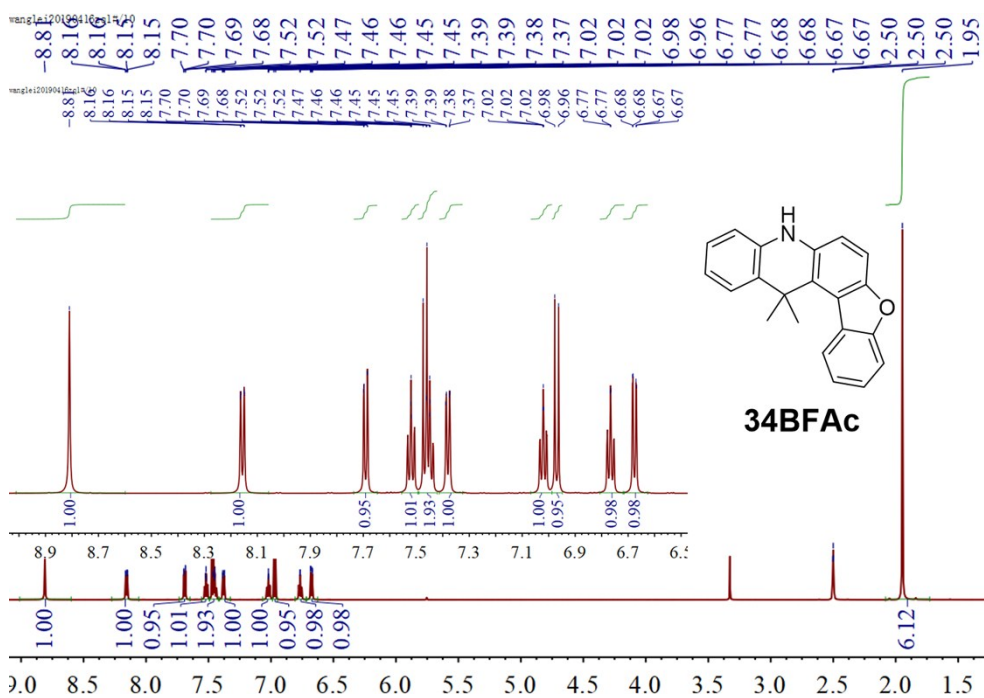

**Fig. S1**  $^1\text{H}$  NMR spectrum of 34BFAC

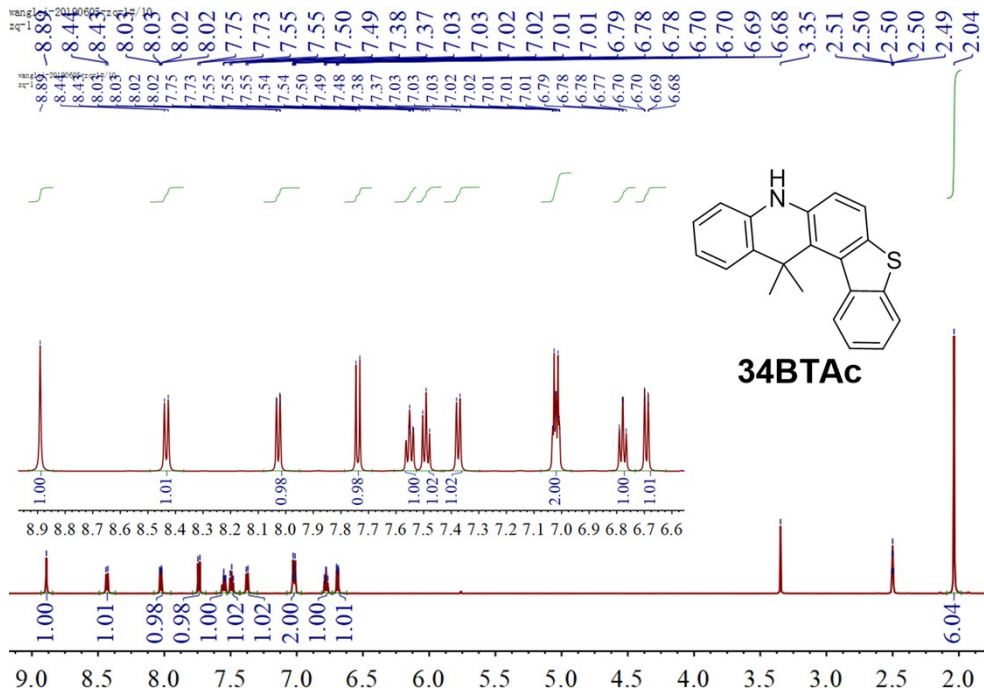

**Fig. S2** <sup>1</sup>H NMR spectrum of 34BTAc

The description for the full name and function of the material in device fabrication was provided as follows:

TAPC: 1,1-bis[4-[*N,N*-di(*p*-tolyl)-amino]phenyl]-cyclohexane; TPBi: 1,3,5-tris(1-phenyl-1*H*-benzo[*d*]imidazol-2-yl)benzene; *m*CP: 1,3-di(9*H*-carbazol-9-yl)benzene; TSP01: diphenyl(4-(triphenylsilyl)phenyl)phosphine oxide; DPEPO:(oxybis(2,1-phenylene))bis(diphenylphosphine oxide).

PEDOT: PSS and LiF acted as hole- and electron-injecting layers, respectively.

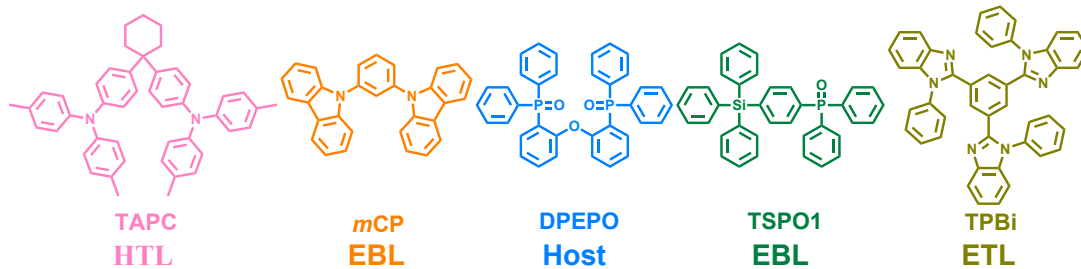

**Scheme S2** The molecular structure and function of the material in device fabrication (HTL: hole-transporting layers; EBL: exciton blocking layer; ETL: electron-transporting layers.)

The TTA mode simulation can be described as follow:<sup>10, 11</sup>

$$\frac{\eta_{ext}^{TT}(J)}{\eta_0} = \frac{J_0}{4J} \left( \sqrt{1 + 8\frac{J}{J_0}} - 1 \right)$$

where  $\eta$ ,  $\eta_0$ , and  $J_0$  represent the EQE in the presence of TTA, initial EQE in the absence of TTA (at very low current densities, rendering the TTA quenching negligible), and the current density at the half-maximum of the EQE, respectively.

Moreover, the SPA model, which can be expressed by Equation:<sup>10, 11</sup>

$$\frac{\eta_{ext}^{SP}(J)}{\eta_0} = \frac{1}{1 + \left(\frac{J}{J_0}\right)^{l+1}}$$

Where  $\eta_{ext}^{SP}$  is the EQE in the presence of SPA and  $l$  is the fitting parameter.

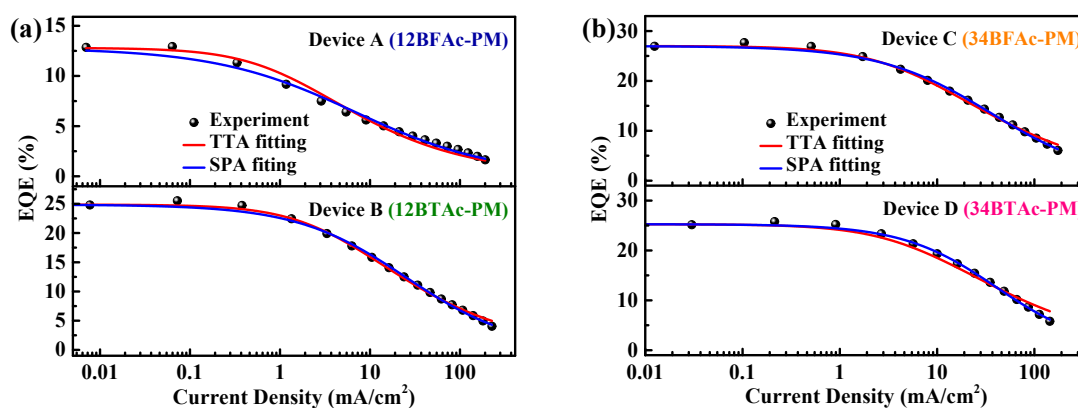

**Fig. S3** The external quantum efficiency (EQE) as a function of current density and the fitting results according to TTA and SPA.

## References

1. S. Kothavale, K. H. Lee and J. Y. Lee, *ACS Appl. Mater. Interfaces*, 2019, **11**, 17583-17591.
2. Y. J. Kang, J. H. Yun, S. H. Han and J. Y. Lee, *J. Mater. Chem. C*, 2019, **7**, 4573-4580.
3. J. G. Yu, S. H. Han, H. L. Lee, W. P. Hong and J. Y. Lee, *J. Mater. Chem. C*, 2019, **7**, 2919-2926.
4. Q. Zhang, S. Sun, X. Lv, W. Liu, H. Zeng, R. Guo, S. Ye, P. Leng, S. Xiang and L. Wang, *Mater. Chem. Front.*, 2018, **2**, 2054-2062.
5. X. Lv, W. Zhang, D. Ding, C. Han, Z. Huang, S. Xiang, Q. Zhang, H. Xu and L. Wang, *Adv. Opt. Mater.*, 2018, **6**, 1800165.
6. X. Lv, R. Huang, S. Sun, Q. Zhang, S. Xiang, S. Ye, P. Leng, F. B. Dias and L. Wang, *ACS Appl. Mater. Interfaces*, 2019, **11**, 10758-10767.
7. S. G. Yoo, W. Song and J. Y. Lee, *Dyes Pigm.*, 2016, **128**, 201-208.
8. J.-X. Chen, W.-W. Tao, K. Wang, C.-J. Zheng, W. Liu, X. Li, X.-M. Ou and X.-H. Zhang, *Org. Electron.*, 2018, **57**, 327-334.
9. Q. Zhang, S. Sun, W. Liu, P. Leng, X. Lv, Y. Wang, H. Chen, S. Ye, S. Zhuang and L. Wang, *J. Mater. Chem. C*, 2019, **7**, 9487-9495.
10. S.-F. Wu, S.-H. Li, Y.-K. Wang, C.-C. Huang, Q. Sun, J.-J. Liang, L.-S. Liao and M.-K. Fung, *Adv. Funct. Mater.*, 2017, **27**, 1701314.
11. S. Reineke, K. Walzer and K. Leo, *Phys. Rev. B*, 2007, **75**, 125328.
